# Supplementary material for: The bithorax complex iab-7 Polycomb response element has a novel role in the functioning of the Fab-7 chromatin boundary
Source: PubMed Central journal article supplement (PMC6110506; doi:10.1371/journal.pgen.1007442), 2018-08-15
Supplement: pgen.1007442.s006.pdf [file pgen.1007442.s006.pdf]

Table S1

| Primer                 | Sequence (5'---->3')                                                                                                                                                                                                                                    |
|------------------------|---------------------------------------------------------------------------------------------------------------------------------------------------------------------------------------------------------------------------------------------------------|
| <i>CHIP analysis</i>   |                                                                                                                                                                                                                                                         |
| 1_d                    | GCCTCTGCTTCTGGACCTATGCTTTATT                                                                                                                                                                                                                            |
| 1_r                    | TTTAGCCCTGCGAAGATATG                                                                                                                                                                                                                                    |
| 2_d                    | GGTGCAGTAGTAAATATAAGCAAAGAG                                                                                                                                                                                                                             |
| 2_r                    | GCGTGCGGTTCTCTTATCAC                                                                                                                                                                                                                                    |
| 3_d                    | GTCGCAAGAACTTCACAACAG                                                                                                                                                                                                                                   |
| 3_r                    | GCCATCATGGATGTGAAAGA                                                                                                                                                                                                                                    |
| 4_d                    | TTCCGCCGACGGCATT                                                                                                                                                                                                                                        |
| 4_r                    | GAACATCAGTTTCGTATGCGAGTTATAG                                                                                                                                                                                                                            |
| $\gamma$ Tub37C_d      | GCTTTCCAAGAAGCTCATAACA                                                                                                                                                                                                                                  |
| $\gamma$ Tub37C_r      | GGTTCAGTGCGGTATTATCCAG                                                                                                                                                                                                                                  |
| hsp70_d                | GACAGAGTGAGAGAGCATTAG                                                                                                                                                                                                                                   |
| hsp70_r                | GGTTATTGTGGTAGGTCATTTG                                                                                                                                                                                                                                  |
| PREeng_d               | AGATGGCATGTGGCTCTCCC                                                                                                                                                                                                                                    |
| PREeng_r               | AACTGTGTCCCAGCGAACTG                                                                                                                                                                                                                                    |
| <i>Probes for EMSA</i> |                                                                                                                                                                                                                                                         |
| dHS1                   | CAAAGAGCGACACGTGAACAGGTGCAGTAGTAAATATAAGCAAAGAGAGTTGGAAAGAG<br>TATTGGCTAAGAGCGTCCGCTCACTAACACATAGATAAATTAAGAGAGACGTGATAAGAG<br>AACCGCACGCACACCACCGCAAAATCCAATTGGAAGAGAGCGACTGCTTGAGTGTATTGGT<br>TAGCAAGAGAGCGGCTAAGGTTTGATGGTTTGATTGGAATTCAGTTGCCGTTTCG |
| dHS1 mut GAGA 3,4      | ACCTCTATCACCGTGAACAGGTGCAGTAGTAAATATAAGCAAACAAATTGGAAAGAGT<br>ATTGGCTAAGAGCGACCGCTCACTAACACATAGATAAATTAACAAAACGTGATAAGAG<br>AACCGCACGCACACCACCGCAAAATCCAATTGGAAGAGAGCGACTGCTTGAATGTATTGGT<br>AAGCAAGAGAGCGGCTAGGTTTGATGGTTTGATTGGAATTCAGTTGCCGTTTCG     |
| dHS1 mut GAGA3-6       | ACCTCTATCACCGTGAACAGGTGCAGTAGTAAATATAAGCAAACAAATTGGAAAGAGT<br>ATTGGCTAAGAGCGACCGCTCACTAACACATAGATAAATTAACAAAACGTGATAAGAG<br>AACCGCACGCACACCACCGCAAAATCCAATTGGAACAAAACGACTGCTTGAATGTATTGGT<br>AAGCAAACAAAACGGCTAGGTTTGATGGTTTGATTGGAATTCAGTTGCCGTTTCG    |
| HS3                    | CAGACGACGTCGCAGGTGAGTGGCGAGCAGAGCAGCATGGAGCGAGCATGGCCGCTGTGGAA<br>TACCGCACTGTTCGTAGGCACGAGCGCGAGCGAGAGAGGCCAAGAGCACGCTCTCTTTCACAT<br>CCATGATGGCTGCCGCTGTCTCGCCTCTTCTTCTTCATTTTCAGCTCGGCCATCATGGGGCTCC<br>ATTAAATCCACT                                   |
| HS3 mut GAGA           | CAGACGACGTCGCAGGTGAGTGGCGAGCAGAGCAGCATGGAGCGAGCATGGCCGCTGTGGAA<br>TACCGCACTGTTCGTAGGCACGAGCGCGAGCTTTTTAGGCCAAGAGCACGTTTTTTTCACATC<br>CATGATGGCTGCCGCTGTCTCGCCTCTTCTTCTTCATTTTCAGCTCGGCCATCATGGGGCTCCA<br>TTAAATCCACT                                    |
| HS3 mut Pho            | CAGACGACGTCGCAGGTGAGTGGCGAGCAGAGCAGCATGGAGCGAGCCGTACCGCTGTGGAA<br>TACCGCACTGTTCGTAGGCACGAGCGCGAGCGAGAGAGGCCAAGAGCACGCTCTCTTTCACAT<br>CCATGCGTACTGCCGCTGTCTCGCCTCTTCTTCTTCATTTTCAGCTCGGTACGCATGGGGCTCC<br>ATTAAATCCACT                                   |
| HS3 overlapping #1     | ACGTCGCAAGAACTTCACAACAGACGACGTCGCAGGTGAGTGGCGAGCAGAGCAGCATGGA<br>GCGAGCATGGCCGCTGTGGAATACCGCACTGTTCGTAGGC                                                                                                                                               |
| HS3 overlapping #2     | GTGGAATACCGCACTGTTCGTAGGCACGAGCGCGAGCGAGAGAGGCCAAGAGCACGCTCTCTT<br>TCACATCCATGATGGCTGCCGCTGTCTCGCCTCTTCTT                                                                                                                                               |
| HS3 overlapping #3     | CACATCCATGATGGCTGCCGCTGTCTCGCCTCTTCTTCTTCATTTTCAGCTCGGCCATCATGGG<br>GCTCCATTAATCCACTGCCTCTT                                                                                                                                                             |
| GAGA 3+4               | CAAAGAGCGACACGTGAACAGGTGCAGTAGTAAATATAAGCAAAGAGAGTTGGAAAGAG<br>TATTGGCTAAGAGCGTCCGCTCACTAACACATAGATAAATTAAGAGAGACGTGATAAGAG<br>AACCGCACGCACACC                                                                                                          |
| roX2                   | ACAATTGCCAAATAATACAGATCGATTTAGAGCGAGATGACAATAGAGAGGGCGATCTCTC<br>TCGTATACGAGTCTTGAAAAGAAAGAGAAGGCGAACGGTGCTGGCTTAGAGAGAGATGGCA<br>ATACTAATTAAGTCAATAATCCGCAATTTTGGTGGCGCTAAAAGTAACGGAAATTC<br>GAGATGCTTTTAGGGCTG                                        |
| GAGA 3                 | CAAAGAGCGACACGTGAACAGGTGCAGTAGTAAATATAAGCAAAGAGAGTTGGAAAGAGT<br>ATTGG                                                                                                                                                                                   |
| GAGA 4                 | ATTGGCTAAGAGCGTCCGCTCACTAACACATAGATAAATTAAGAGAGACGTGATAAGAGA<br>ACCGC                                                                                                                                                                                   |
| GAGA 3 + lacZ          | CAAAGAGCGACACGTGAACAGGTGCAGTAGTAAATATAAGCAAAGAGAGTTGGAAAGAGT<br>ATTGGGGCACCCAGGCTTTACACTTTATGCTTCCGGCTCGTATGTTGTGTGGAATTGTGAGCG<br>GATAACAATTCACA                                                                                                       |
